# Supplementary material for: Optimizing TDP-43 silencing with siRNA-loaded polymeric nanovectors in neuronal cells for therapeutic applications: balancing knockdown and function
Source: Royal Society of Chemistry journal article supplement (doi:10.1039/d4nr03159h), 2024-01-01
Supplement: d4nr03159h1.pdf [file d4nr03159h1.pdf]

## Supplementary Information

for

### Optimizing TDP-43 silencing with siRNA-loaded polymeric nanovectors in neuronal cells for therapeutic applications: balancing knockdown and function

Annamaria Russo<sup>a</sup>, Gabriele Maiorano<sup>a</sup>, Barbara Cortese<sup>b</sup>, Stefania D'Amone<sup>a</sup>, Alessandra Invidia<sup>c</sup>, Angelo Quattrini<sup>d</sup>, Alessandro Romano<sup>d,e,\*</sup>, Giuseppe Gigli<sup>a,f</sup> and Ilaria E. Palamà<sup>a,\*</sup>

<sup>a</sup>Nanotechnology Institute, CNR-NANOTEC, Monteroni street - 73100 Lecce, Italy;

<sup>b</sup>Nanotechnology Institute, CNR-NANOTEC, c/o La Sapienza University, P. le A. Moro- 00185 Rome, Italy

<sup>c</sup>Department of Mathematics and Physics, University of Salento, Monteroni Street, 73100 Lecce, Italy

<sup>d</sup>IRCCS San Raffaele Scientific Institute, Neuropathology Unit, Division of Neuroscience, Institute of Experimental Neurology, Milan, 20132 Italy

<sup>e</sup>Department of Life Sciences, Health and Health Professions, Link Campus University del Casale di San Pio V street, 44 , I-00165 Rome, Italy

<sup>f</sup>Department of Experimental Medicine, University of Salento, c/o Campus Ecotekne, Monteroni street, 73100 Lecce, Italy.\*

Correspondence: [romano.alessandro@hsr.it](mailto:romano.alessandro@hsr.it), [ilaria.palama@nanotec.cnr.it](mailto:ilaria.palama@nanotec.cnr.it)

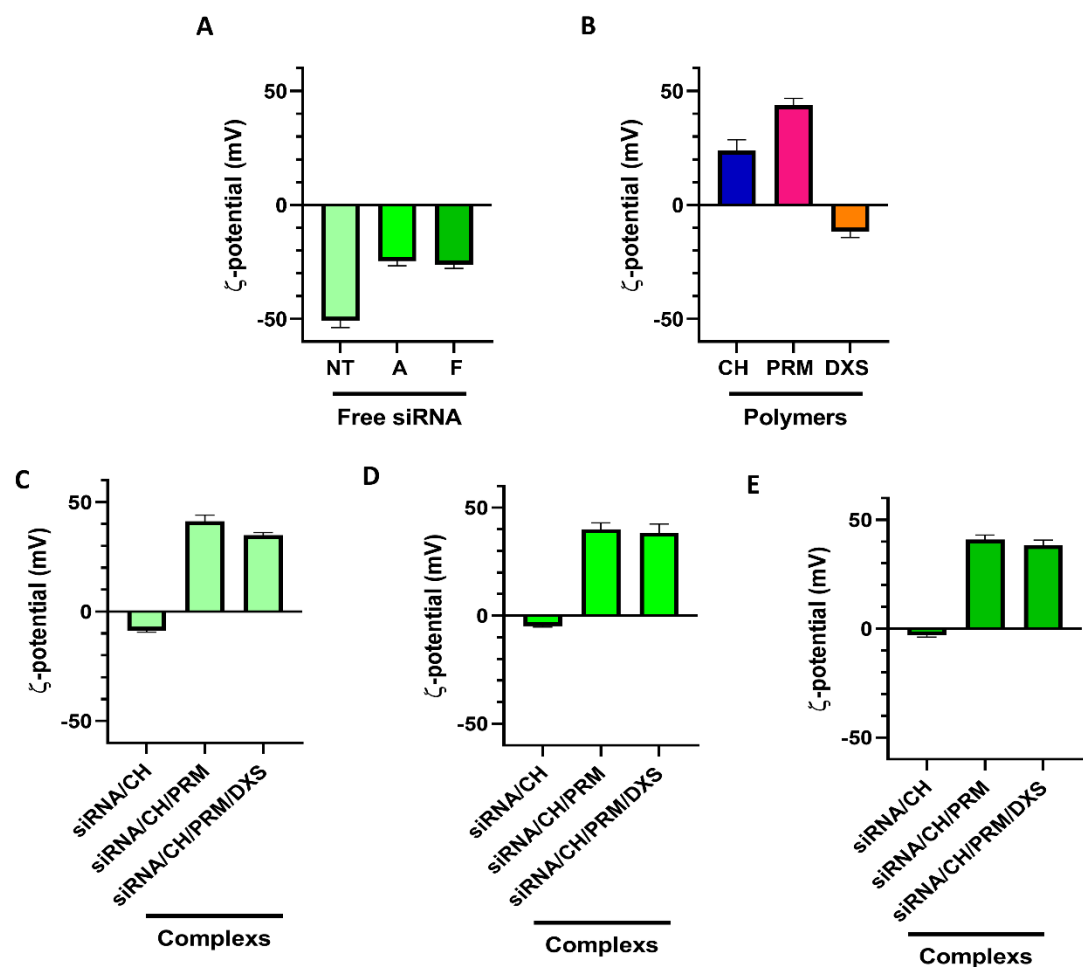

**Figure S1.** Histograms of  $\zeta$ -potential measurements. (A) Free siRNA (NT, A, F); (B) polymers (chitosan, CH; protamine, PRM; and dextran, DXS); (C-E) complex (siRNA/CH; siRNA/CH/PRM; and siRNA/CH/PRM/DXS) with siRNA variants. (C) siRNA-NT, (D) siRNA-A, and (E) siRNA-F.

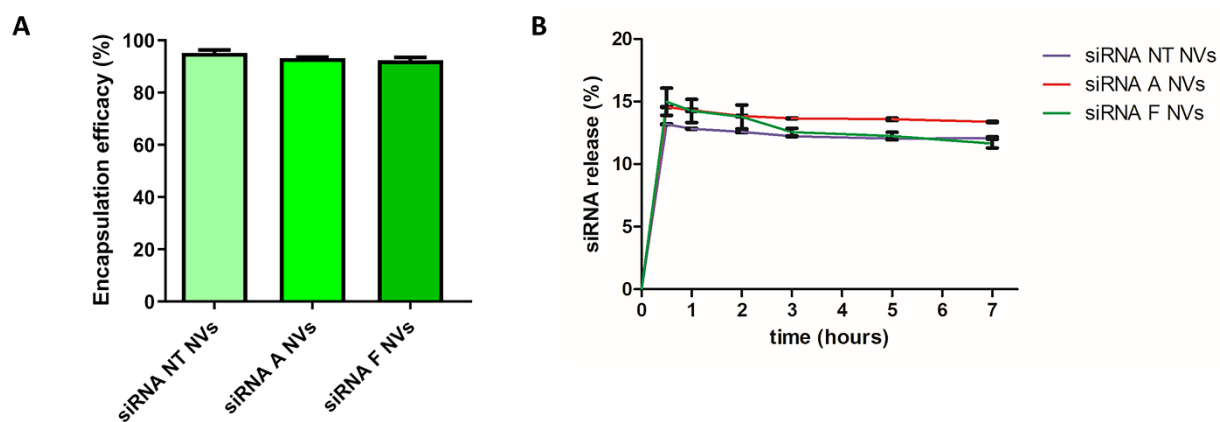

**Figure S2.** Encapsulation efficacy of different siRNA loaded NVs (A) and their release (% B) when subject to acid conditions (pH 4.5) for a time window of up to 7 hours. Representative measurements of three distinct sets of data have been reported. Data are shown as mean  $\pm$  SEMs and analyzed by one-way ANOVA (no statistical difference).

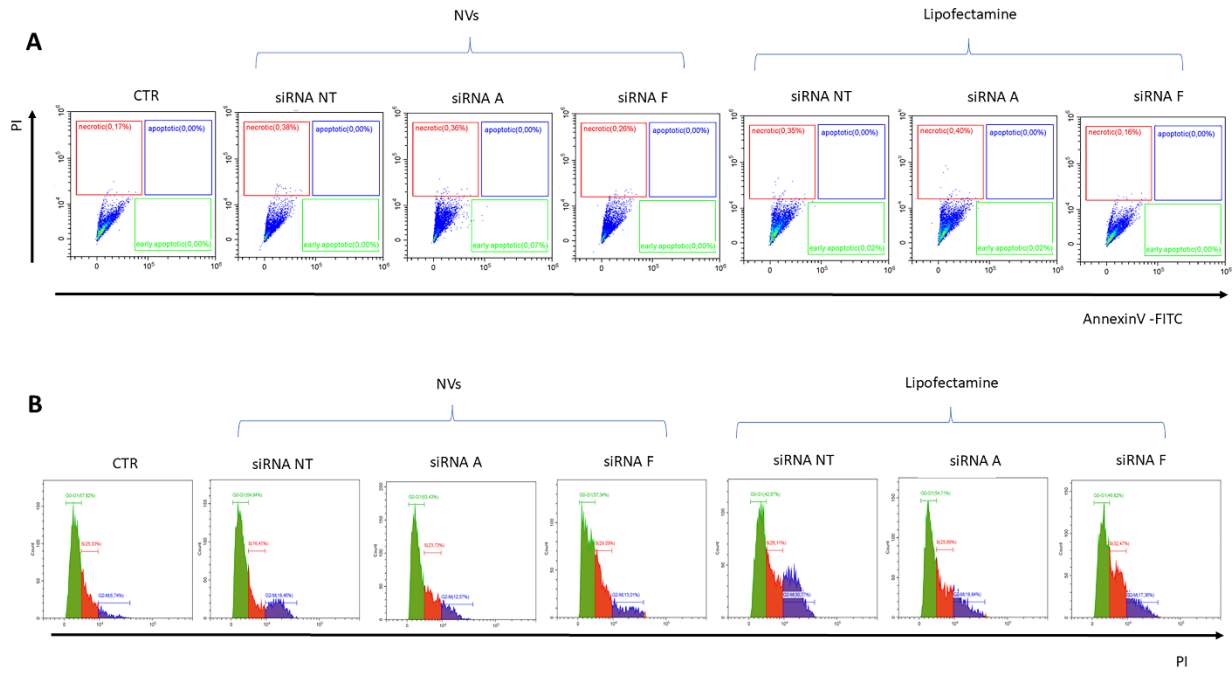

**Figure S3.** Analysis of cell apoptosis (A) and cell cycle (B) of neuroblastoma cells after treatments with siRNA-loaded NVs or delivered with lipofectamine.

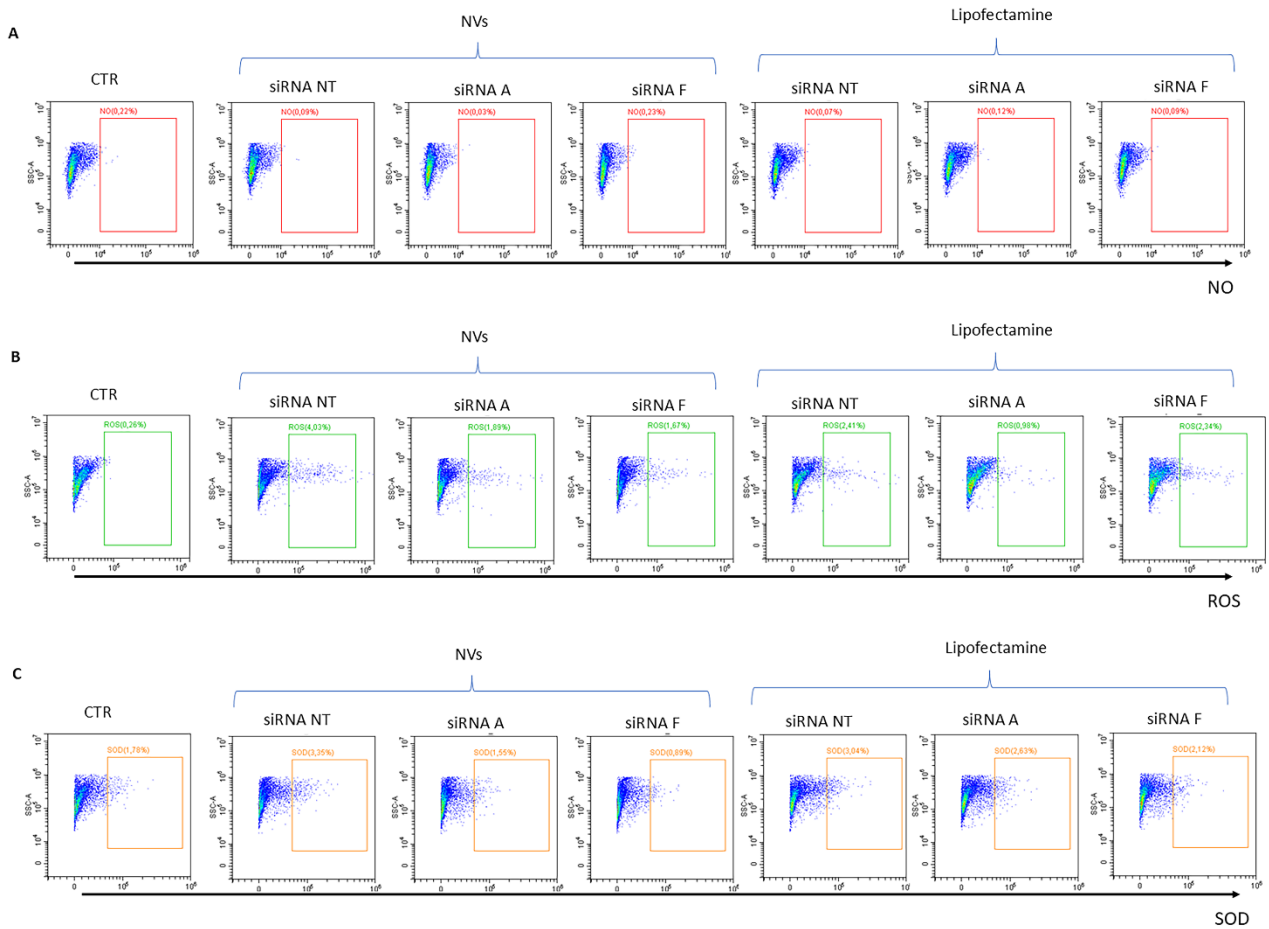

**Figure S4.** Cytofluorimetric analysis of the production of NO (A), ROS (B) and SOD activity inhibition (C) in neuroblastoma cells after treatment with siRNA-loaded NVs or delivered with lipofectamine.

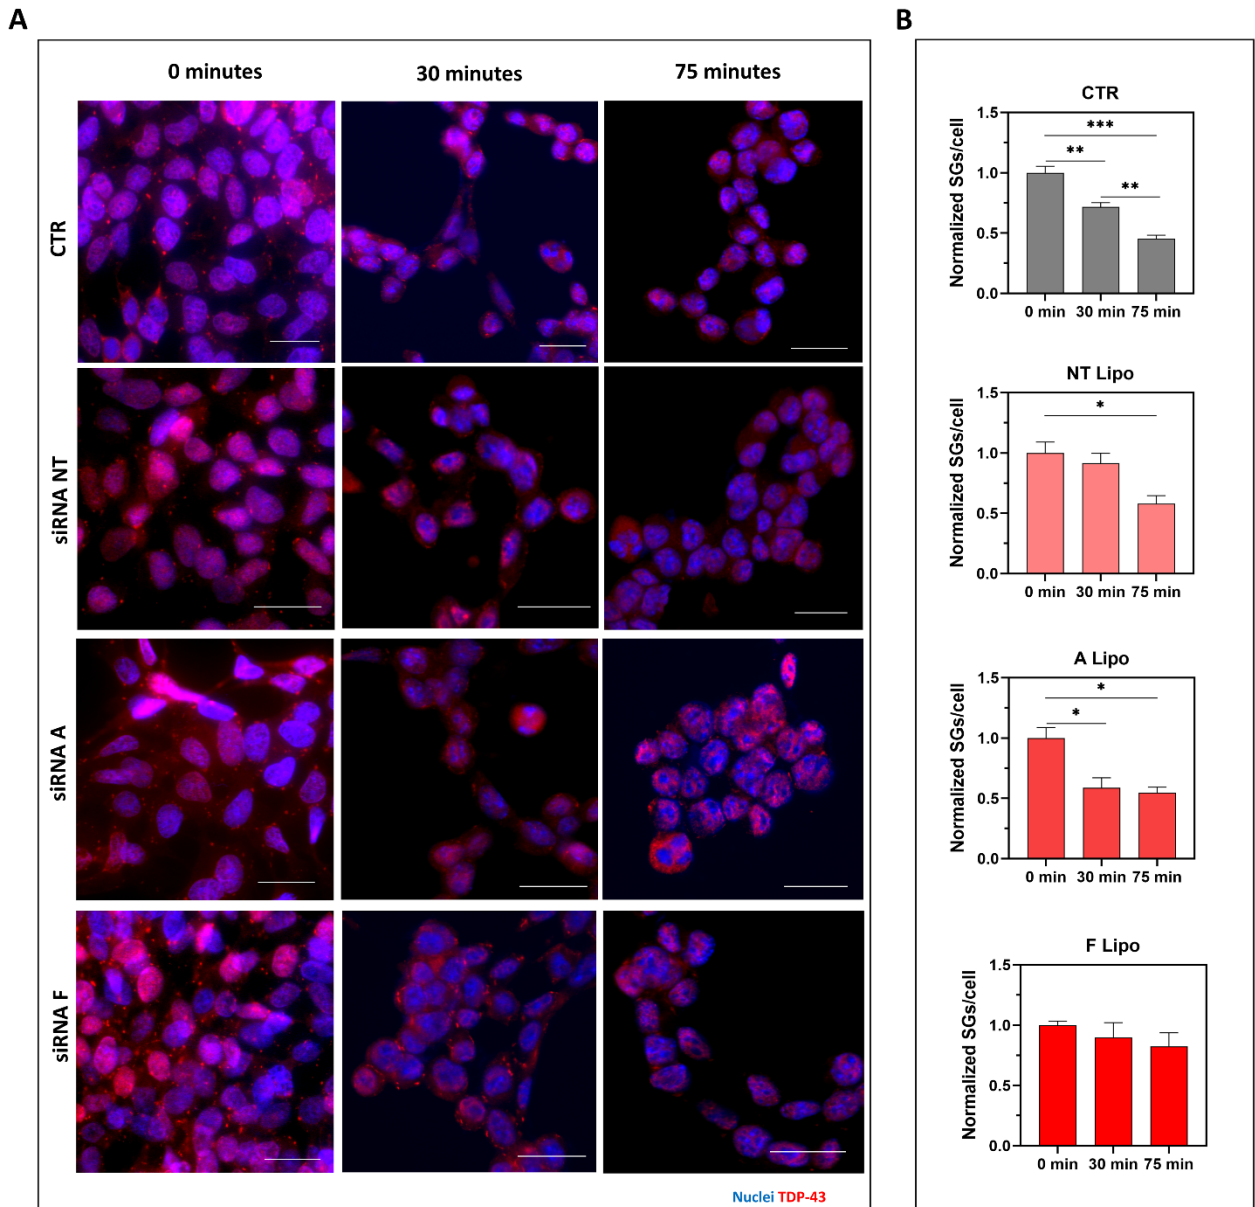

**Figure S5.** Fluorescent images of localization of SG in neuroblastoma cells (A) after treatments with siRNA-loaded lipofectamine for 48 hours and stressed with SA for 45 minutes and after recovery of 30 minutes or 75 minutes. Nuclei were stained with DAPI (blue), TDP-43 labeled in red. *Scale bars:* 25  $\mu$ m. Number of TDP-43 positive SGs per cells (B), after treatment with siRNA NT (NT Lipo), siRNA A (A Lipo), or siRNA F (F Lipo) loaded lipofectamine for 48 hours and SA stressed for 45 minutes, untreated cells are used control (CTR). Data are shown as mean  $\pm$  SEMs and analyzed by one-way ANOVA followed by Tukey's Multiple Comparison tests (\*  $p < 0.05$ ; \*\*  $p < 0.01$ ; \*\*\*  $p < 0.001$ ).
